# Supplementary material for: Manipulation of Promyelocytic Leukemia Protein Nuclear Bodies by Marek’s Disease Virus Encoded US3 Protein Kinase
Source: MDPI journal article supplement (doi:10.3390/microorganisms9040685), 2021-03-26
Supplement: s1 [file s1]

**Table S1.** Effect of MDV U<sub>s</sub>3 on PML expression.

|                        | Cells positive for PML | Percentages of cells positive for PML (%) | Numbers of PML dots/ PML positive cell |
|------------------------|------------------------|-------------------------------------------|----------------------------------------|
| U <sub>s</sub> 3       | 23 ± 7.1 *             | 46 ± 14.2 *                               | 1.75 ± 0.4 **                          |
| U <sub>s</sub> 3-K220A | 46 ± 1.4               | 92 ± 2.8                                  | 4.1 ± 0.7                              |
| Ev                     | 50 ± 0                 | 100 ± 0                                   | 5 ± 0.1                                |

Values are presented as average ± standard error (SD). Student t test was performed between U<sub>s</sub>3, or U<sub>s</sub>3-K220A and empty vector (Ev) transfected cells, and statistical significance is indicated with asterisk. \*: p < 0.05; \*\*: p < 0.01.

**Table S2.** Effect of MDV U<sub>s</sub>3 on SP100 expression.

|                        | Cells positive for SP100 | Percentage of cells positive for SP100 (%) | Numbers of SP100 dots / SP100 positive cell |
|------------------------|--------------------------|--------------------------------------------|---------------------------------------------|
| U <sub>s</sub> 3       | 23 ± 1.4 *               | 46 ± 2.8 *                                 | 2.9 ± 0 **                                  |
| U <sub>s</sub> 3-K220A | 47.5 ± 0.7               | 95 ± 1.4                                   | 10.4 ± 0.6                                  |
| Ev                     | 50 ± 0                   | 100 ± 0                                    | 11.9 ± 0.7                                  |

Values are presented as average ± standard error (SD). Student t test was performed between U<sub>s</sub>3, or U<sub>s</sub>3-K220A and empty vector (Ev) transfected cells, and statistical significance is indicated with asterisk. \*: p < 0.05; \*\*: p < 0.01.

**Table S3.** Effect of MG-132 treatment on MDV U<sub>s</sub>3 induced disruption of PML.

|                        |        | Percentage of cells positive for PML (%) | Numbers of PML dots/ PML positive cell |
|------------------------|--------|------------------------------------------|----------------------------------------|
| U <sub>s</sub> 3       | DMSO   | 56 ± 5.6                                 | 2.9 ± 0.1                              |
|                        | MG-132 | 75 ± 7                                   | 4.15 ± 0.1                             |
| U <sub>s</sub> 3-K220A | DMSO   | 93 ± 1.4                                 | 4.5 ± 0.1                              |
|                        | MG-132 | 96 ± 2.8                                 | 4.9 ± 0.4                              |
| Ev                     | DMSO   | 100 ± 0                                  | 5.4 ± 0.4                              |
|                        | MG-132 | 100 ± 0                                  | 5.9 ± 0.1                              |

Values are presented as average ± standard error (SD).

**Table S4.** Effect of MG-132 treatment on MDV U<sub>s</sub>3 induced disruption of SP100.

|                        |        | Percentage of cells positive for SP100 (%) | Number of SP100 dots/ SP100 positive cell |
|------------------------|--------|--------------------------------------------|-------------------------------------------|
| U <sub>s</sub> 3       | DMSO   | 50 ± 5.6                                   | 4.7 ± 0.7                                 |
|                        | MG-132 | 73 ± 4.2                                   | 7.8 ± 0.7                                 |
| U <sub>s</sub> 3-K220A | DMSO   | 93 ± 1.4                                   | 11.45 ± 1.3                               |
|                        | MG-132 | 96 ± 0                                     | 12.4 ± 0.4                                |
| Ev                     | DMSO   | 100 ± 0                                    | 11.7 ± 0.3                                |
|                        | MG-132 | 100 ± 0                                    | 12.6 ± 0.1                                |

Values are presented as average ± standard error (SD).
